# Supplementary material for: Synergistic effect of inhibiting CHK2 and DNA replication on cancer cell growth
Source: eLife journal article supplement (doi:10.7554/elife.104718), 2024-12-30
Supplement: fig3-data1 [file Figure 3-Source data 1.pdf › Figure 3-Source data 1.pdf]

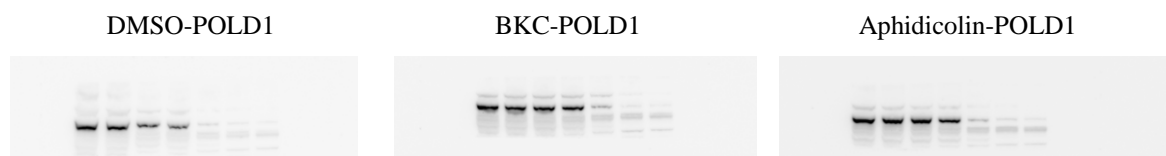

**Figure 3, Source Data 1.** Original membranes corresponding to Figure 3, panel C.

**Figure 3. BKC directly binds to DNA polymerases. A-B.** *In silico* molecular docking of bakuchiol in the predicted active site structures of human DNA Pol  $\delta$  and  $\epsilon$ , respectively. **C-D.** MCF-7 cells were treated with DMSO, 40  $\mu$ M BKC or 10  $\mu$ M Aphidicolin for 2 hours prior to the cellular thermal sensitivity shift assay (CETSA) at indicated temperature, as described in the Materials and Methods. Levels of POLD1 (Pol  $\delta$ ; panel C) and POLE (Pol $\epsilon$ ; panel D) catalytic subunits were detected by western blotting. Mean and SEM of three independent experiments are shown. The p-values were determined by two-tailed paired t-test.

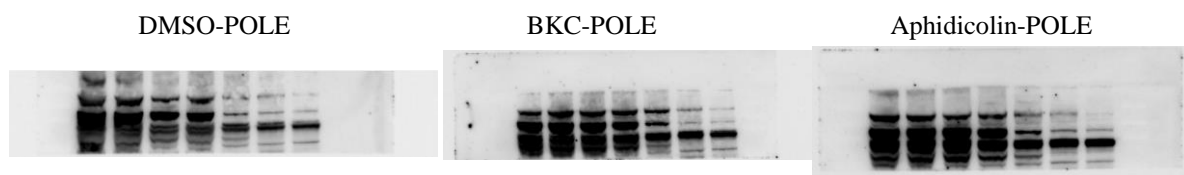

**Figure 3, Source Data 1.** Original membranes corresponding to Figure 3, panel D.

**Figure 3. BKC directly binds to DNA polymerases. A-B.** *In silico* molecular docking of bakuchiol in the predicted active site structures of human DNA Pol  $\delta$  and  $\epsilon$ , respectively. **C-D.** MCF-7 cells were treated with DMSO, 40  $\mu$ M BKC or 10  $\mu$ M Aphidicolin for 2 hours prior to the cellular thermal sensitivity shift assay (CETSA) at indicated temperature, as described in the Materials and Methods. Levels of POLD1 (Pol  $\delta$ ; panel C) and POLE (Pol  $\epsilon$ ; panel D) catalytic subunits were detected by western blotting. Mean and SEM of three independent experiments are shown. The p-values were determined by two-tailed paired t-test.
