# Supplementary material for: Synergistic effect of inhibiting CHK2 and DNA replication on cancer cell growth
Source: eLife journal article supplement (doi:10.7554/elife.104718), 2024-12-30
Supplement: fig3-figsupp1-data1 [file Figure 3-figure supplement 1-Source data 1.pdf › Figure 3-figure supplement 1-Source data 1.pdf]

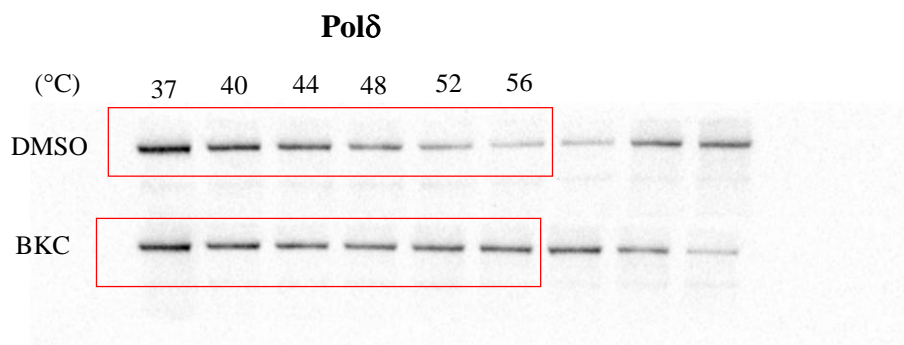

**Figure 3-figure supplement 1, Source Data 1.** Original membranes corresponding to Figure 3-figure supplement 1, panel A.

The treatment and experimental temperatures are indicated.

**Figure 3-figure supplement 1. BKC does not interact with PCNA. A-C.** *Xenopus* egg extracts were incubated with DMSO or 40  $\mu$ M BKC for 2 hours prior to the cellular thermal sensitivity shift assay (CETSA) at indicated temperature, as described in the Materials and Methods. The residual amount of the DNA Pol $\delta$  catalytic subunit POLD1 (p125, **A**) and the accessory subunit POLD3 (p66, **B**) or PCNA (**C**) in the supernatant was detected by western blotting. Mean of two independent experiments is shown.

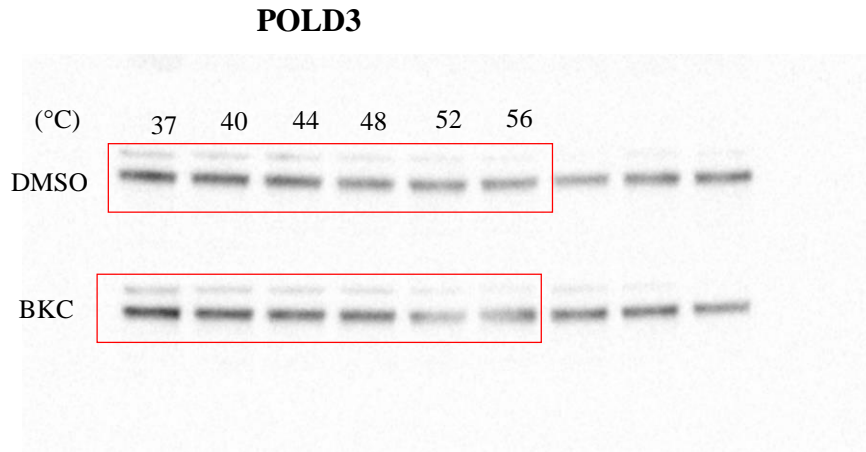

**Figure 3-figure supplement 1, Source Data 1.** Original membranes corresponding to Figure 3-figure supplement 1, panel B.

The treatment and experimental temperatures are indicated.

**Figure 3-figure supplement 1. BKC does not interact with PCNA. A-C.** *Xenopus* egg extracts were incubated with DMSO or 40  $\mu$ M BKC for 2 hours prior to the cellular thermal sensitivity shift assay (CETSA) at indicated temperature, as described in the Materials and Methods. The residual amount of the DNA Pol $\delta$  catalytic subunit POLD1 (p125, **A**) and the accessory subunit POLD3 (p66, **B**) or PCNA (**C**) in the supernatant was detected by western blotting. Mean of two independent experiments is shown.

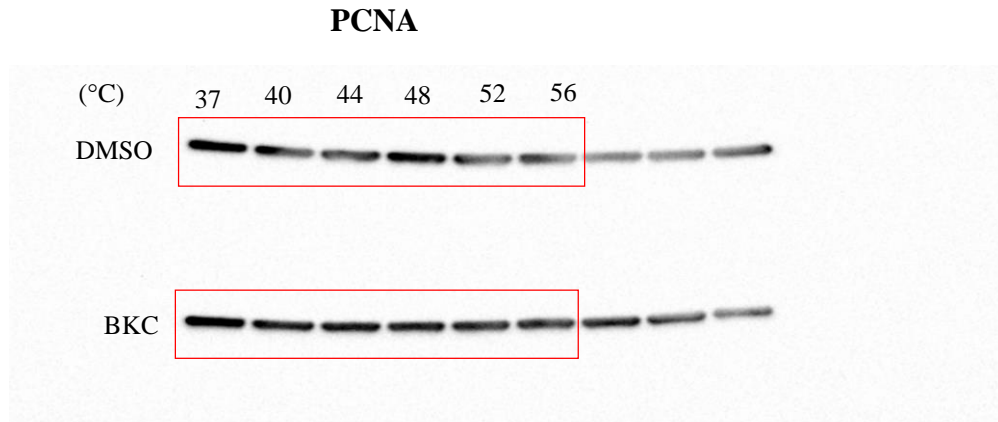

**Figure 3-figure supplement 1, Source Data 1.** Original membranes corresponding to Figure 3-figure supplement 1, panel C.

The treatment and experimental temperatures are indicated.

**Figure 3-figure supplement 1. BKC does not interact with PCNA. A-C.** *Xenopus* egg extracts were incubated with DMSO or 40  $\mu$ M BKC for 2 hours prior to the cellular thermal sensitivity shift assay (CETSA) at indicated temperature, as described in the Materials and Methods. The residual amount of the DNA Pol $\delta$  catalytic subunit POLD1 (p125, **A**) and the accessory subunit POLD3 (p66, **B**) or PCNA (**C**) in the supernatant was detected by western blotting. Mean of two independent experiments is shown.
