# Supplementary material for: Synergistic effect of inhibiting CHK2 and DNA replication on cancer cell growth
Source: eLife journal article supplement (doi:10.7554/elife.104718), 2024-12-30
Supplement: fig4-figsupp1-data1 [file Figure 4-figure supplement 1-Source data 1.pdf › Figure 4-figure supplement 1-Source data 1.pdf]

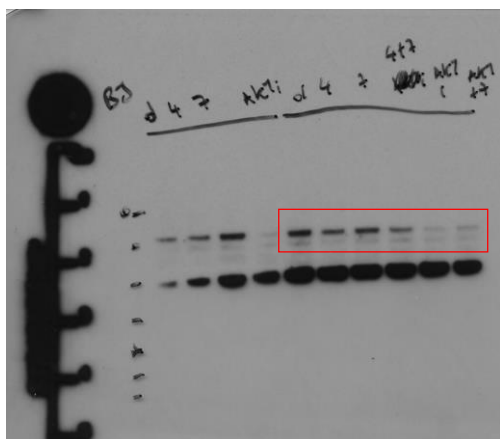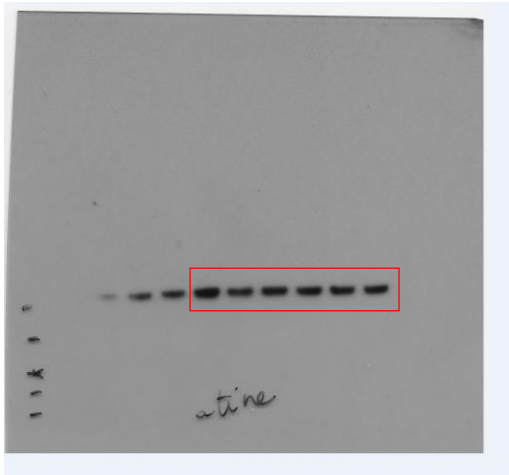

**Figure 4-figure supplement 1, Sources Data 1.** Original membranes corresponding to Figure 4-figure supplement 1. 4 and 7 are our codes BKC and IBC, respectively. d: DMSO control; 7+4: means BKC+IBC.

**Figure 4-figure supplement 1. IBC does not inhibit AKT activity in MCF-7 cells. A.** MCF-7 cells treated with DMSO, 15  $\mu$ M IBC, 20  $\mu$ M BKC, the combination IBC + BKC or AKT inhibitor, MK-2206, (AKTi, 10  $\mu$ M) for 24 hours. Auto-phosphorylation of AKT was detected by immunoblotting analysis. Densitometric quantification of phosphor-AKT signal is shown. (n=2)
